# Supplementary material for: Four isostructural lanthanide metal–organic frameworks: luminescence properties and fluorescence sensing for Fe3+and Cr2O72−ions
Source: Royal Society of Chemistry journal article supplement (doi:10.1039/d3ce00142c), 2023-01-01
Supplement: d3ce00142c1.pdf [file d3ce00142c1.pdf]

# Electronic Supplementary Information

## Four isostructural lanthanide metal–organic frameworks: luminescent properties and fluorescence sensing for Fe<sup>3+</sup> and Cr<sub>2</sub>O<sub>7</sub><sup>2-</sup> ions

Li-Juan Zhao, Bin Li and Guo-Ping Yong\*

Department of Chemistry, University of Science and Technology of China, Hefei  
230026, P. R. China

E-mail: [gpyong@ustc.edu.cn](mailto:gpyong@ustc.edu.cn)

**Table S1** Selected bond distances (Å) and angles (°) for **1**<sup>a</sup>.

| <b>1</b>            |            |
|---------------------|------------|
| Eu(1)-O(1)          | 2.308(3)   |
| Eu(1)-O(3)          | 2.382(3)   |
| Eu(1)-O(4)#4        | 2.363(3)   |
| Eu(1)-O(5)#5        | 2.431(3)   |
| Eu(1)-O(6)#5        | 2.522(3)   |
| Eu(1)-O(7)          | 2.426(4)   |
| Eu(1)-O(8)          | 2.373(3)   |
| Eu(1)-O(9)          | 2.441(4)   |
| O(1)-Eu(1)-O(3)     | 85.22(12)  |
| O(1)-Eu(1)-O(4)#4   | 86.75(11)  |
| O(1)-Eu(1)-O(5)#5   | 88.36(13)  |
| O(1)-Eu(1)-O(6)#5   | 75.70(12)  |
| O(1)-Eu(1)-O(7)     | 75.72(14)  |
| O(1)-Eu(1)-O(8)     | 144.10(13) |
| O(1)-Eu(1)-O(9)     | 147.00(13) |
| O(3)-Eu(1)-O(4)#4   | 157.11(12) |
| O(3)-Eu(1)-O(5)#5   | 73.02(11)  |
| O(3)-Eu(1)-O(6)#5   | 121.89(10) |
| O(3)-Eu(1)-O(7)     | 78.82(13)  |
| O(3)-Eu(1)-O(8)     | 70.48(12)  |
| O(3)-Eu(1)-O(9)     | 120.82(13) |
| O(4)#4-Eu(1)-O(5)#5 | 128.14(11) |
| O(4)#4-Eu(1)-O(6)#5 | 76.43(10)  |
| O(4)#4-Eu(1)-O(7)   | 78.43(13)  |
| O(4)#4-Eu(1)-O(8)   | 105.37(13) |
| O(4)#4-Eu(1)-O(9)   | 75.53(13)  |
| O(5)#5-Eu(1)-O(6)#5 | 52.44(10)  |
| O(5)#5-Eu(1)-O(7)   | 148.67(15) |
| O(5)#5-Eu(1)-O(8)   | 108.26(14) |
| O(5)#5-Eu(1)-O(9)   | 81.46(14)  |
| O(6)#5-Eu(1)-O(7)   | 142.65(12) |
| O(6)#5-Eu(1)-O(8)   | 139.60(13) |
| O(6)#5-Eu(1)-O(9)   | 73.21(12)  |
| O(7)-Eu(1)-O(8)     | 73.96(15)  |
| O(7)-Eu(1)-O(9)     | 125.78(15) |
| O(8)-Eu(1)-O(9)     | 68.53(13)  |

<sup>a</sup> Symmetry code: #4 = -x+1, y+1/2, -z+1/2, #5 = -x, -y, -z.

**Table S2** The comparison this work with recently published articles related to sensing

| analytes                                                                                          | Ln-MOFs                                                                                                              | solvents         | quenching constants<br><b>K<sub>sv</sub> (M<sup>-1</sup>)</b> | detection limits<br>( <b>μM</b> ) | references       |
|---------------------------------------------------------------------------------------------------|----------------------------------------------------------------------------------------------------------------------|------------------|---------------------------------------------------------------|-----------------------------------|------------------|
| <b>Fe<sup>3+</sup></b>                                                                            | <b>1</b>                                                                                                             | H <sub>2</sub> O | 8.31×10 <sup>3</sup>                                          | 6.93                              | <i>This Work</i> |
|                                                                                                   | <b>2</b>                                                                                                             | H <sub>2</sub> O | 5.63×10 <sup>3</sup>                                          | 26.11                             | <i>This Work</i> |
|                                                                                                   | <b>3</b>                                                                                                             | H <sub>2</sub> O | 2.86×10 <sup>4</sup>                                          | 1.72                              | <i>This Work</i> |
|                                                                                                   | <b>4</b>                                                                                                             | H <sub>2</sub> O | 1.50×10 <sup>4</sup>                                          | 3.63                              | <i>This Work</i> |
|                                                                                                   | [Eu(BCB)(DMF)]·(DMF) <sub>1.5</sub> (H <sub>2</sub> O) <sub>2</sub>                                                  | H <sub>2</sub> O | 2.35 ×10 <sup>4</sup>                                         | 1.78                              | [1]              |
|                                                                                                   | [Eu(PMBB) <sub>1.5</sub> (H <sub>2</sub> O) <sub>2</sub> ]                                                           | H <sub>2</sub> O | 3.66×10 <sup>3</sup>                                          | 2.09                              | [2]              |
|                                                                                                   | [Tb(PMBB) <sub>1.5</sub> (H <sub>2</sub> O) <sub>2</sub> ]                                                           | H <sub>2</sub> O | 3.53×10 <sup>3</sup>                                          | 2.22                              |                  |
|                                                                                                   | [Tb <sub>4</sub> (TATB) <sub>2</sub> ]                                                                               | H <sub>2</sub> O | 5.95×10 <sup>3</sup>                                          | 4.84                              | [3]              |
|                                                                                                   | {[Eu(qptca) <sub>1/2</sub> (H <sub>2</sub> qptca) <sub>1/2</sub> (H <sub>2</sub> O) <sub>2</sub> ]·DMF} <sub>n</sub> | H <sub>2</sub> O | 2.28×10 <sup>3</sup>                                          | 6.45                              | [4]              |
|                                                                                                   | [Eu <sub>3</sub> (BDC) <sub>4.5</sub> (H <sub>2</sub> O)(DMF) <sub>2</sub> ]                                         | H <sub>2</sub> O | 1.30×10 <sup>5</sup>                                          | 11.53                             | [5]              |
|                                                                                                   | [Tb(tftba) <sub>1.5</sub> (phen)(H <sub>2</sub> O)] <sub>n</sub>                                                     | H <sub>2</sub> O | 4.04×10 <sup>4</sup>                                          | 12.70                             | [6]              |
|                                                                                                   | {[Eu(dpc)(2H <sub>2</sub> O)]·(Hbibp) <sub>0.5</sub> } <sub>n</sub>                                                  | DMF              | 4.84×10 <sup>3</sup>                                          | 13.20                             | [7]              |
|                                                                                                   | [Eu <sub>4</sub> (pta) <sub>5</sub> (Hpta) <sub>2</sub> (H <sub>2</sub> O) <sub>4</sub> ]·9H <sub>2</sub> O          | H <sub>2</sub> O | 1.12×10 <sup>4</sup>                                          | 35.00                             | [8]              |
|                                                                                                   | [Tb(Hpta)(C <sub>2</sub> O <sub>4</sub> )]·3H <sub>2</sub> O                                                         | H <sub>2</sub> O | 1.22×10 <sup>4</sup>                                          | 26.00                             |                  |
|                                                                                                   | <b>Cr<sub>2</sub>O<sub>7</sub><sup>2-</sup></b>                                                                      | <b>1</b>         | H <sub>2</sub> O                                              | 1.04×10 <sup>4</sup>              | 5.11             |
| <b>2</b>                                                                                          |                                                                                                                      | H <sub>2</sub> O | 1.37×10 <sup>4</sup>                                          | 1.97                              | <i>This Work</i> |
| <b>3</b>                                                                                          |                                                                                                                      | H <sub>2</sub> O | 2.31×10 <sup>4</sup>                                          | 1.71                              | <i>This Work</i> |
| <b>4</b>                                                                                          |                                                                                                                      | H <sub>2</sub> O | 2.85×10 <sup>4</sup>                                          | 2.10                              | <i>This Work</i> |
| [Eu(PMBB) <sub>1.5</sub> (H <sub>2</sub> O) <sub>2</sub> ]                                        |                                                                                                                      | H <sub>2</sub> O | 7.18×10 <sup>3</sup>                                          | 1.07                              | [2]              |
| [Tb(PMBB) <sub>1.5</sub> (H <sub>2</sub> O) <sub>2</sub> ]                                        |                                                                                                                      | H <sub>2</sub> O | 1.06×10 <sup>4</sup>                                          | 0.74                              |                  |
| [Zn(4-dptb)(2,2'-bha)]·4H <sub>2</sub> O                                                          |                                                                                                                      | H <sub>2</sub> O | 2.84×10 <sup>3</sup>                                          | 1.43                              | [9]              |
| [Cd(4dptb)(4,4'-odpa)(H <sub>2</sub> O) <sub>2</sub> ]·H <sub>2</sub> O                           |                                                                                                                      | H <sub>2</sub> O | 1.85×10 <sup>3</sup>                                          | 4.46                              |                  |
| Eu-MOF(H <sub>3</sub> L)                                                                          |                                                                                                                      | H <sub>2</sub> O | 1.29×10 <sup>4</sup>                                          | 1.95                              | [10]             |
| [Cd(DPTTZ) (5-AIP)]                                                                               |                                                                                                                      | H <sub>2</sub> O | 3.31×10 <sup>4</sup>                                          | 2.60                              | [11]             |
| Tb-MOF(H <sub>2</sub> atdbc)                                                                      |                                                                                                                      | H <sub>2</sub> O | 8.5×10 <sup>3</sup>                                           | 2.92                              | [12]             |
| {[Cd <sub>2</sub> (TFBA)(bibp) <sub>2</sub> H <sub>2</sub> O]·DMF·2H <sub>2</sub> O} <sub>n</sub> |                                                                                                                      | H <sub>2</sub> O | 6.73×10 <sup>5</sup>                                          | 3.60                              | [13]             |
| {[Eu(dpc)(2H <sub>2</sub> O)]·(Hbibp) <sub>0.5</sub> } <sub>n</sub>                               |                                                                                                                      | DMF              | 3.97×10 <sup>3</sup>                                          | 10.10                             | [7]              |

H<sub>3</sub>BCB = 4,4',4''-benzenetricarbonyltri-benzoic acid;  
H<sub>2</sub>PMBB = 4,4'-((1,4-phenylenebis(methylene))bis(oxy))dibenzoic acid;  
H<sub>3</sub>TATB = 4,4',4''-(1,3,5-triazine-2,4,6-triyl)tribenzoic acid;  
H<sub>4</sub>qptca = [1,1':4',1'':4'',1''':4''',1''':4''',1''''-quinquephenyl]-2,2'',2''',5''-tetracarboxylic acid;  
H<sub>2</sub>BDC = 1,4-benzenedicarboxylic acid;  
phen = 1,10-phenanthroline; H<sub>2</sub>tftba = 2,3,5,6-tetrafluoroterephthalic acid;  
H<sub>4</sub>dpc = 2-(3',4'-dicarboxylphenoxy)isophthalic acid; bibp = 4,4'-bis(imidazolyl)biphenyl;  
H<sub>2</sub>ppta = 2-(4-pyridyl)terephthalic acid; H<sub>2</sub>C<sub>2</sub>O<sub>4</sub> = oxalic acid;  
4-dptb = N<sup>3</sup>,N<sup>4</sup>-bis(pyridine-4-ylmethyl)thiophene-3,4-dicarboxamide; 2,2'-H<sub>2</sub>bha = 2,2'-biphenyl acid; 4,4'-H<sub>2</sub>odpa = 4,4'-oxybisbenzoic acid;  
H<sub>3</sub>L = 4,4',4''-triazine-2,4,6-tribenzoic acid;  
5-AIP = 5-Aminoisophthalic acid; DPTTZ = 2, 5-di(pyridine-4-yl)thiazolo[5,4-d]thiazole;  
H<sub>2</sub>atdbc = 4,4'-(4-amino-1,2,4-triazol-3,5-diyl)dibenzoic acid;  
H<sub>3</sub>TFBA = tris(3'-F-4'-carboxybiphenyl)amine; bibp = 4,4'-Di(1H-imidazole-1-yl)-1,1'-biphenyl.

## References

- [1] M. Y. Zhang, F. Y. Yi, L. J. Liu, G. P. Yan, H. Liu and J. F. Guo, *Dalton Trans.*, 2021, **50**, 15593-15601.
- [2] Z. D. Zhou, C. Y. Wang, G. S. Zhu, B. Du, B. Y. Yu, C. C. Wang, *J. Mol. Struct.*, 2022, **1251**, 132009.
- [3] X. F. Zhang, L. H. Feng, S. Y. Ma, T. F. Xia, F. F. Jiao, Z. Kong, X. Duan, *J. Solid State Chem.*, 2022, **312**, 123232.
- [4] J. Q. Wu, X. Y. Ma, C. L. Liang, J. M. Lu, Q. Shi and L. X. Shao, *Dalton Trans.*, 2022, **51**, 28902-897.
- [5] J. J. Zhao, P. Y. Liu, Z. P. Dong, Z. L. Liu, Y. Q. Wang, *Inorg. Chim. Acta.*, 2020, **511**, 119843.
- [6] H. H. Yu, J. Q. Chi, Z. M. Su, X. Li, J. Sun, C. Zhou, X. L. Hu and Q. Liu, *CrystEngComm*, 2020, **22**, 3638-3643.
- [7] Y. Du, H. Y. Yang, R. J. Liu, C. Y. Shao and L. R. Yang, *Dalton Trans.*, 2020, **49**, 13003-13016.
- [8] L. J. Duan, C. C. Zhang, P. P. Cen, X. Y. Jin, C. Liang, J. H. Yang and X. Y. Liu, *CrystEngComm*, 2020, **22**, 1695-1704
- [9] X. L. Wang, Y. Wang, N. Xu, J. X. Ma and G. C. Liu, *CrystEngComm*, 2023, **25**, 1186-1192.
- [10] Y. X. Sun, G. Guo, W. M. Ding, W. Y. Han, J. Li and Z. P. Deng, *CrystEngComm*, 2022, **24**, 1358-1367.
- [11] A. K. Hosseini, Y. Pourshirzad, A. Tadjarodi, *J. Solid State Chem.*, 2023, **317**, 123676.
- [12] J. X. Li, B. Q. Yu, L. H. Fan, L. Wang, Y. C. Zhao, C. Y. Sun, W. J. Li, Z. D.

Chang, *J. Solid State Chem.*, 2022, **306**, 122782.

[13] J. Ru, R. F. Zhang, Y. X. Wang, X. X. Ma, Q. Gu, X. M. Du, L. L. Li, Y. L. Wang, *J. Solid State Chem.*, 2022, **311**, 123119.

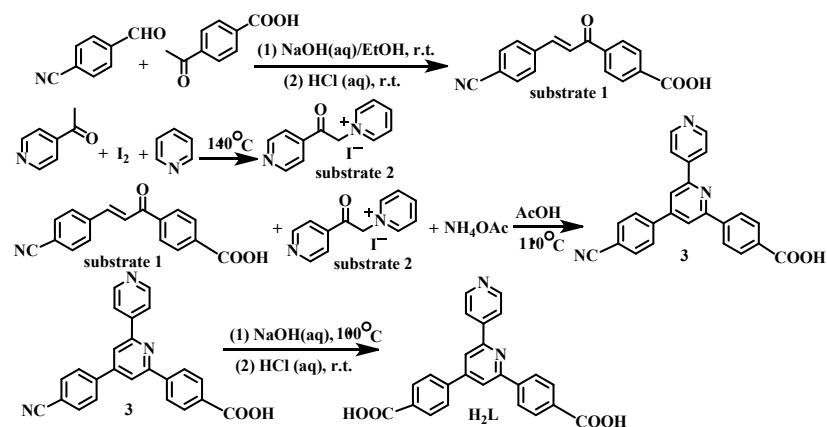

**Scheme S1** The synthesis procedure for H<sub>2</sub>L ligand.

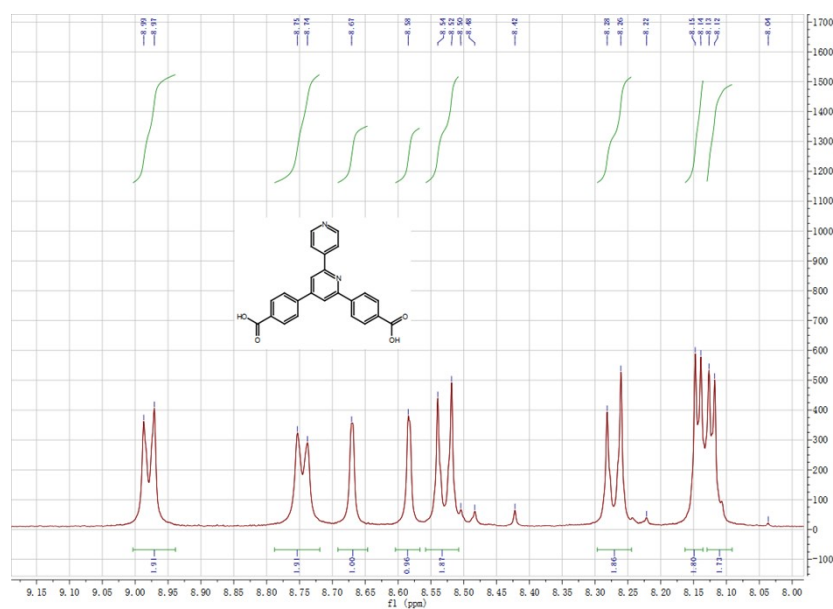

**Fig. S1** <sup>1</sup>H NMR (400 MHz, dmsO-*d*<sub>6</sub>) of H<sub>2</sub>L ligand.

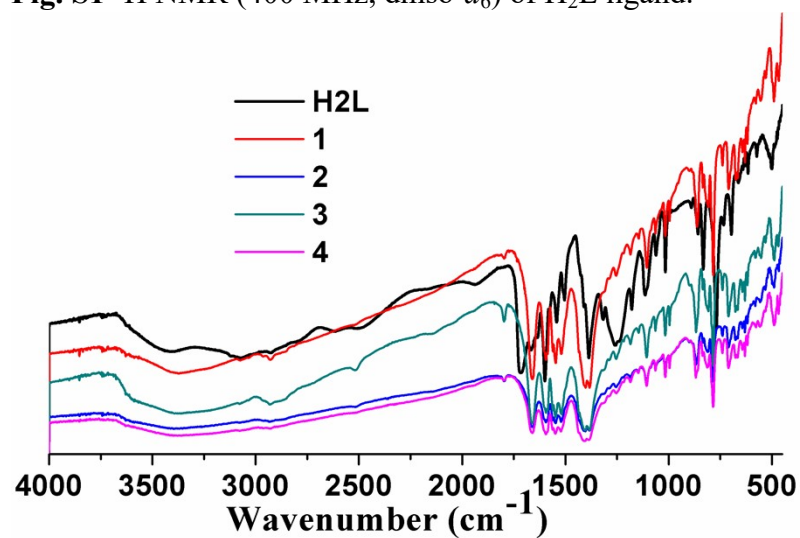

**Fig. S2** IR absorption of H<sub>2</sub>L ligand and Ln-MOFs 1–4.

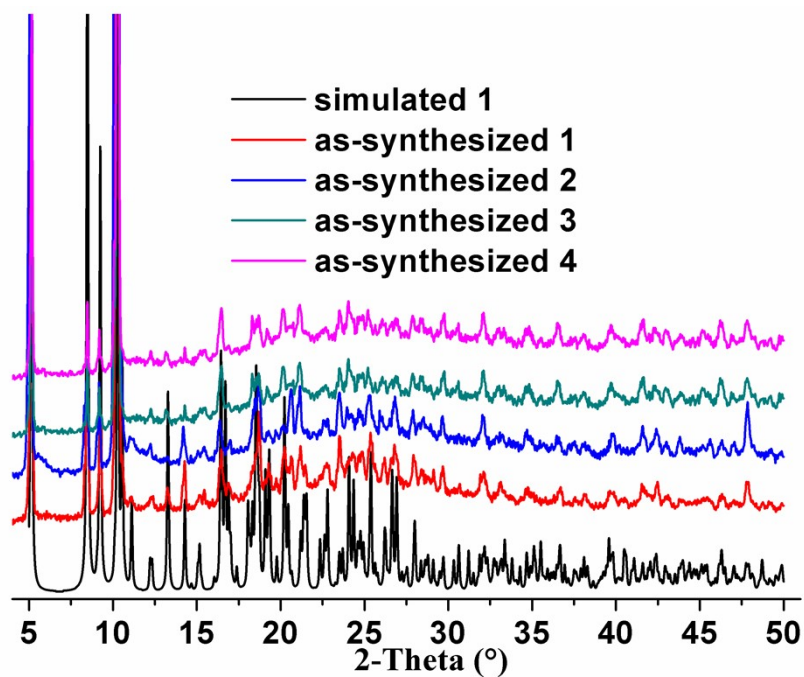

**Fig. S3** Powder XRD profiles of simulated **1** and as-synthesized Ln-MOFs **1–4**.

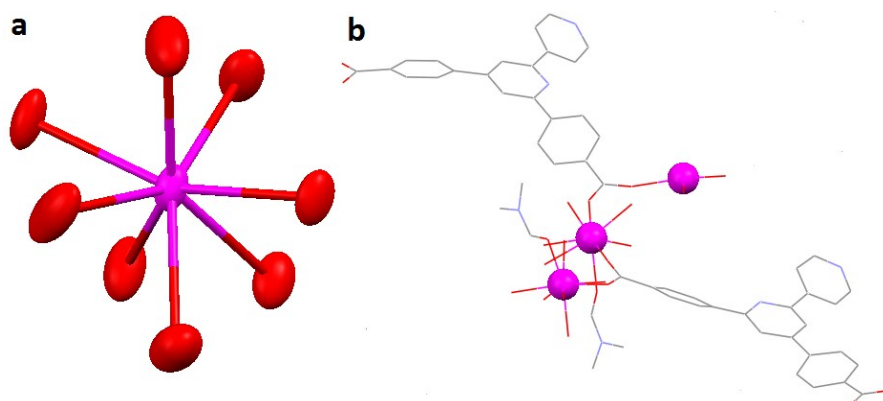

**Fig. S4** (a) The distorted dodecahedral coordination geometry of  $\text{Eu}^{3+}$  centre, (b) the trinuclear secondary building unit in **1**.

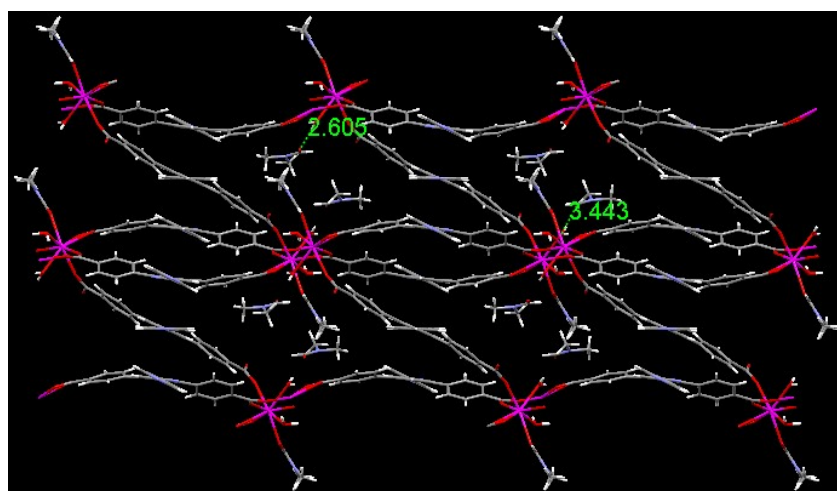

**Fig. S5** The supramolecular interactions between guest DMF molecules and the coordinating  $\text{H}_2\text{O}$  molecules in **1**.

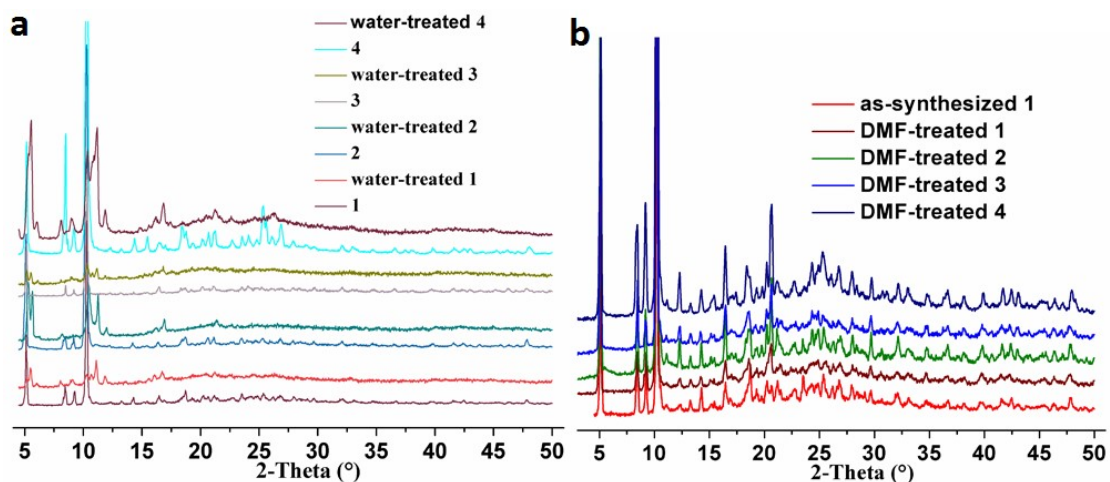

**Fig. S6** Powder XRD profiles of (a) as-synthesized Ln-MOFs 1–4 and water-treated 1–4, (b) as-synthesized 1 and DMF-treated 1–4.

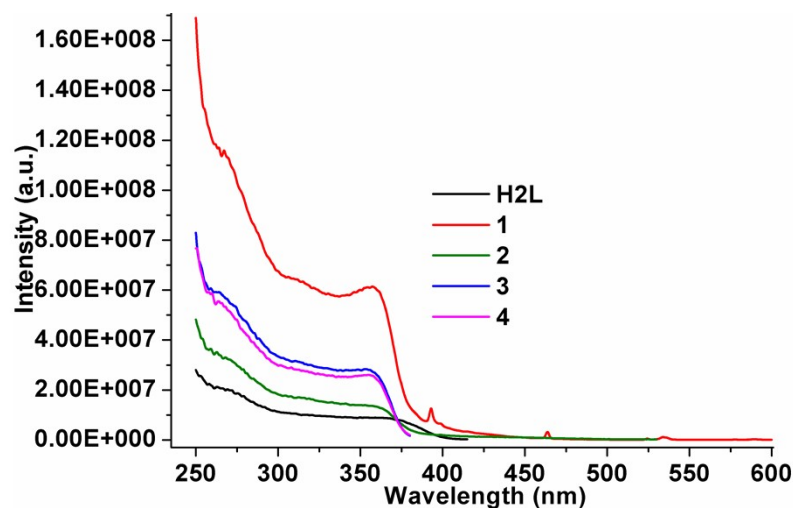

**Fig. S7** Solid-state excitation spectra of H<sub>2</sub>L ligand and Ln-MOFs 1–4.

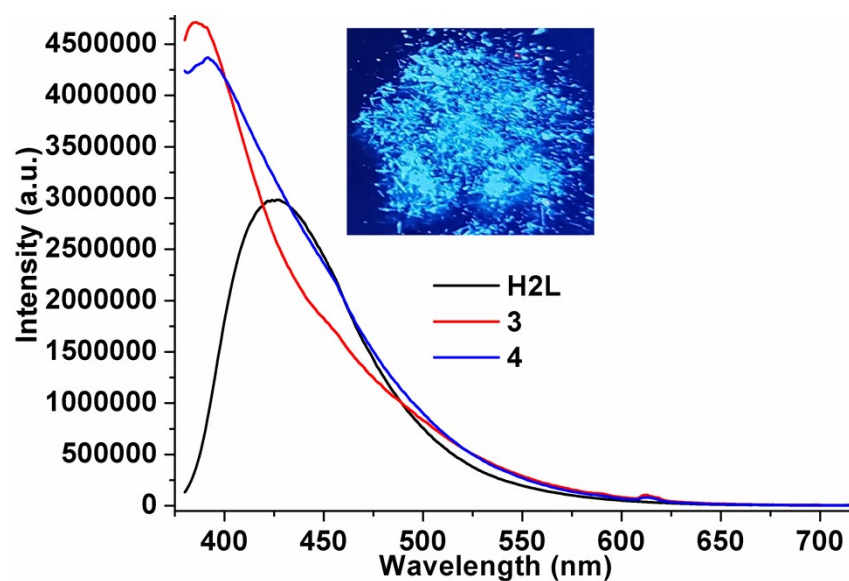

**Fig. S8** Solid-state emission spectra of H<sub>2</sub>L ligand, and Ln-MOFs 3 and 4 (the inset is the corresponding photograph of 4 taken under 254 nm UV irradiation).

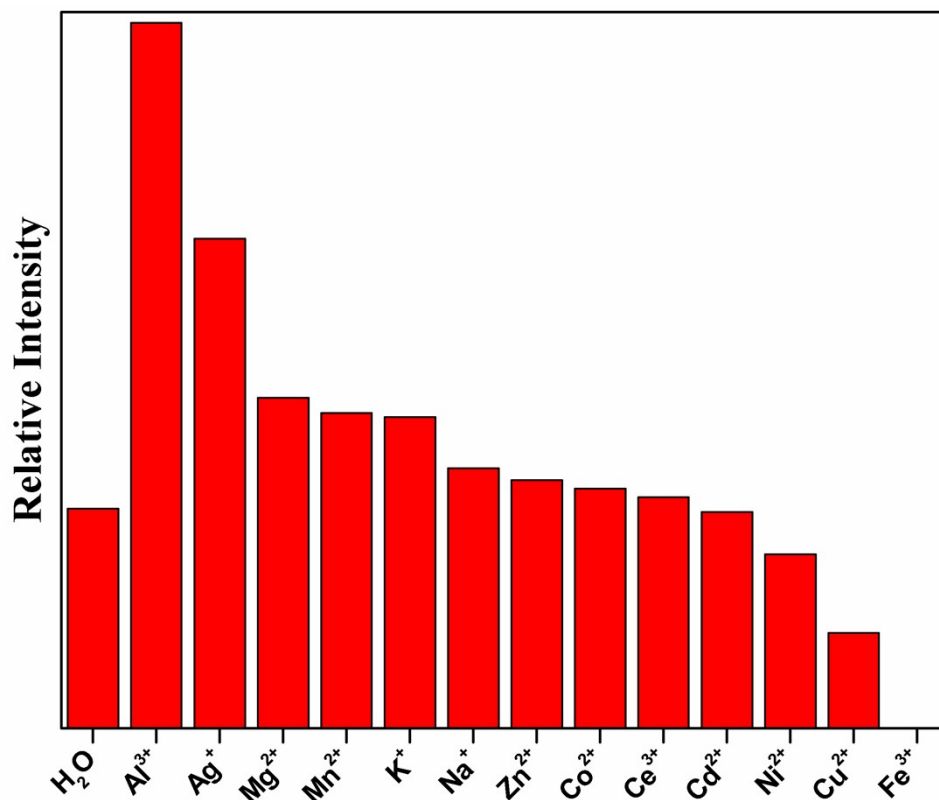

**Fig. S9** The bar chart of luminescent intensities at maximum emission wavelength (*ca.* 613 nm) of **1** suspended in different metal ion aqueous solutions.

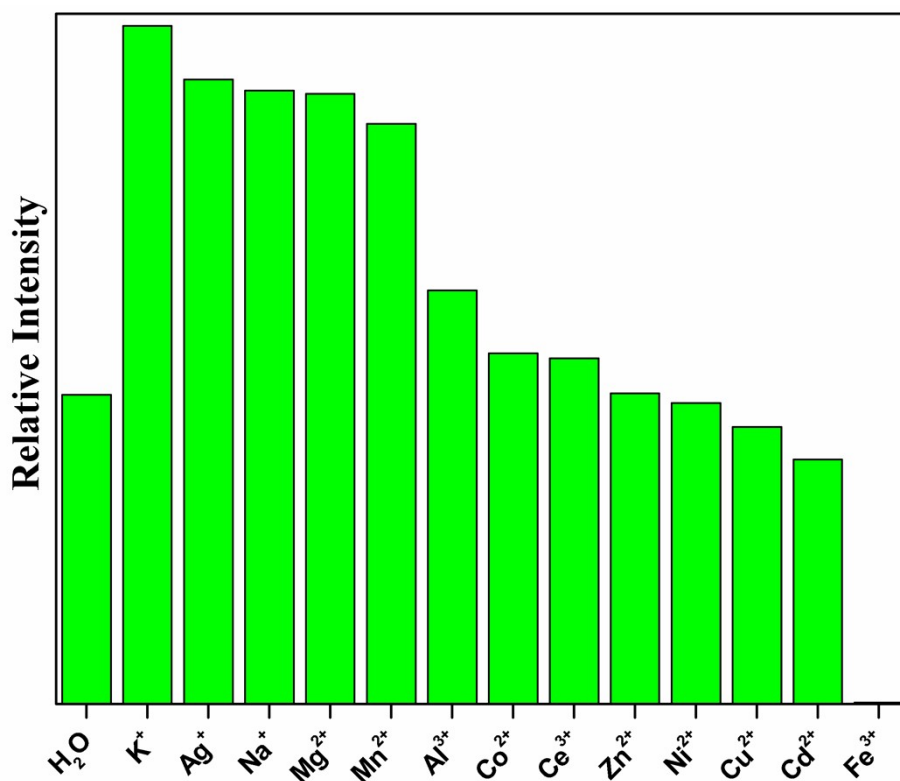

**Fig. S10** The bar chart of luminescent intensities at maximum emission wavelength (*ca.* 542 nm) of **2** suspended in different metal ion aqueous solutions.

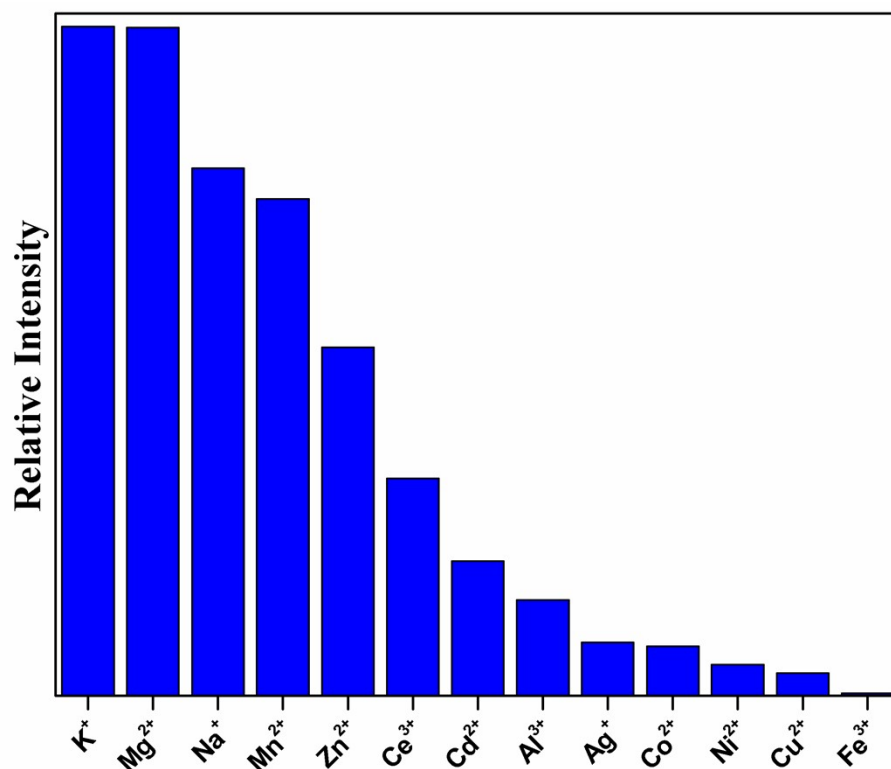

**Fig. S11** The bar chart of luminescent intensities at maximum emission wavelength (ca. 386 nm) of **3** suspended in different metal ion aqueous solutions.

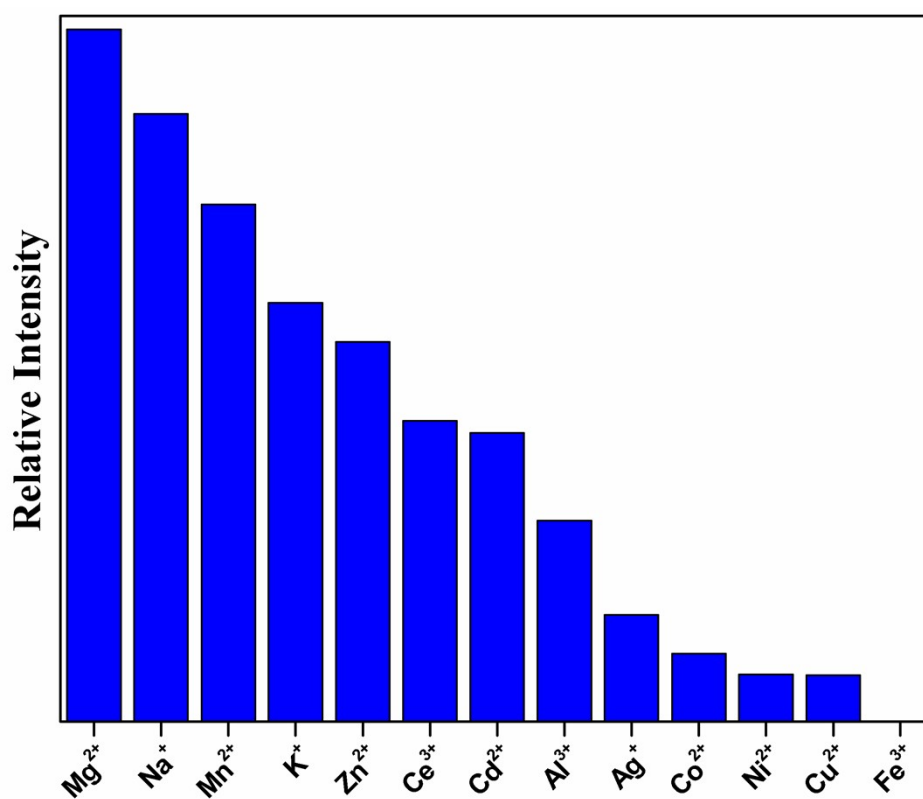

**Fig. S12** The bar chart of luminescent intensities at maximum emission wavelength (ca. 392 nm) of **4** suspended in different metal ion aqueous solutions.



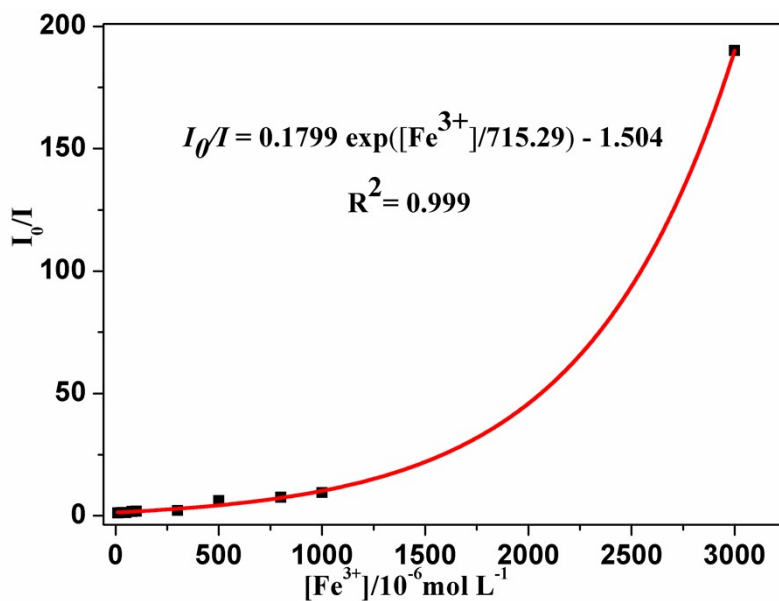

Fig. S13 Plot of  $I_0/I$  versus concentration of  $Fe^{3+}$  ion aqueous solutions for **1**.

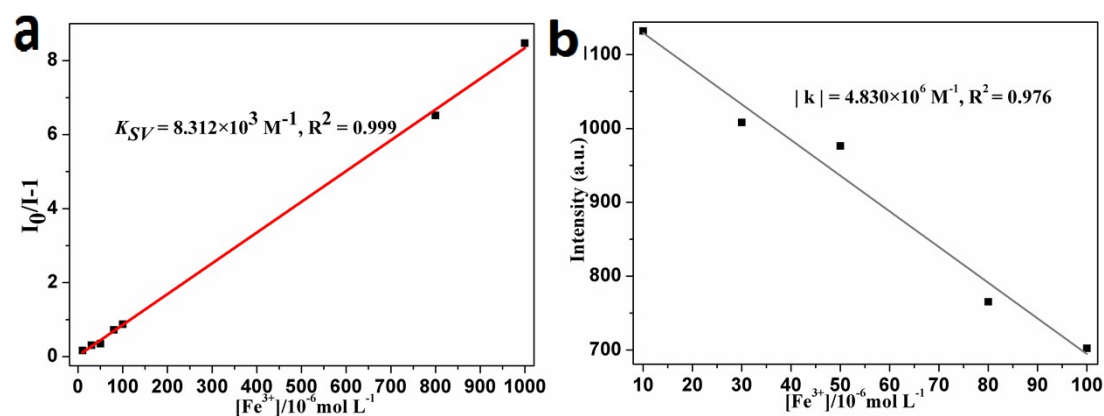

Fig. S14 (a) Stern–Volmer plot of  $I_0/I-1$  versus concentration of  $Fe^{3+}$  ion aqueous solutions for **1**. (b) Luminescent intensity versus concentration of  $Fe^{3+}$  ion aqueous solutions for **1**.

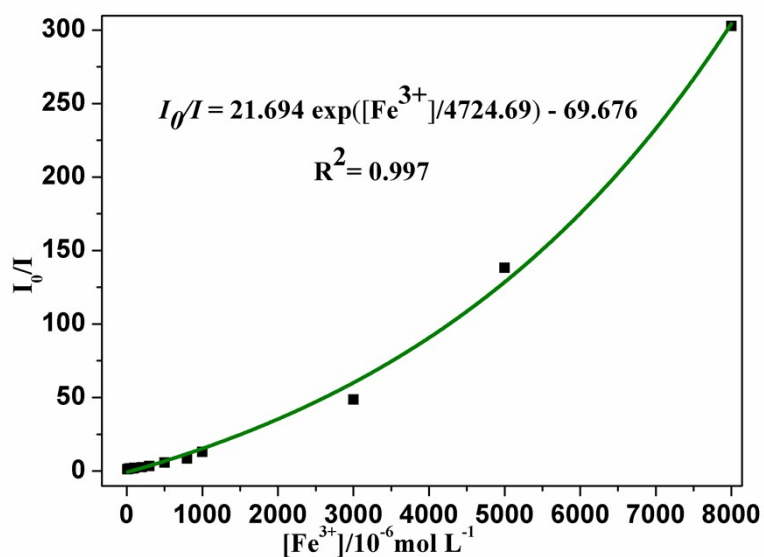

Fig. S15 Plot of  $I_0/I$  versus concentration of  $Fe^{3+}$  ion aqueous solutions for **2**.

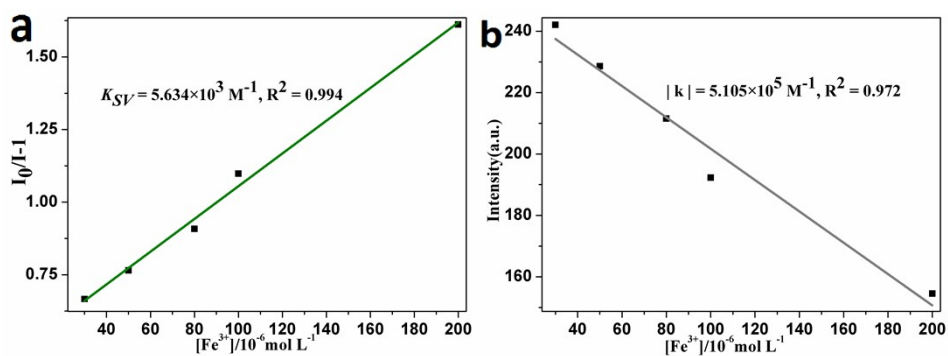

**Fig. S16** (a) Stern–Volmer plot of  $I_0/I-1$  versus concentration of  $Fe^{3+}$  ion aqueous solutions for **2**. (b) Luminescent intensity versus concentration of  $Fe^{3+}$  ion aqueous solutions for **2**.

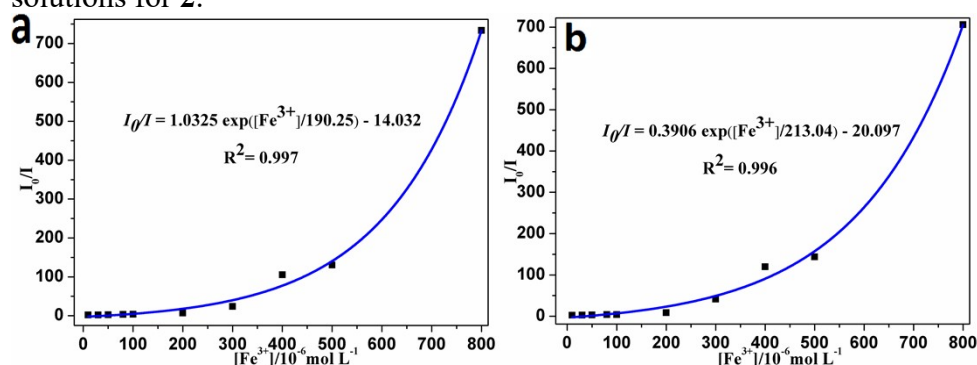

**Fig. S17** Plot of  $I_0/I$  versus concentration of  $Fe^{3+}$  ion aqueous solutions for **3** (a) and **4** (b).

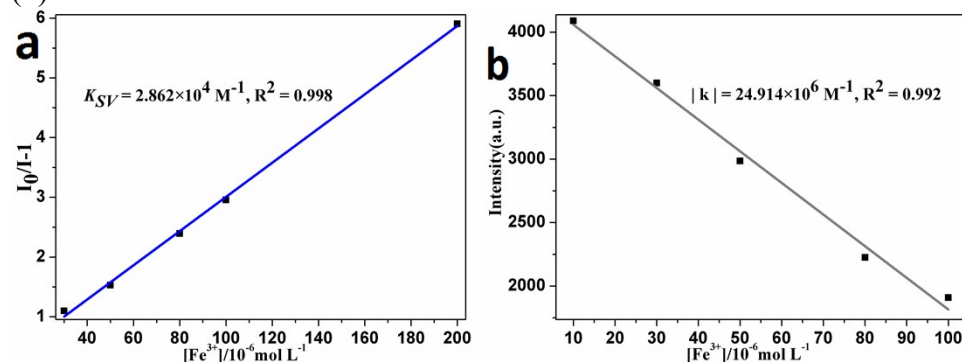

**Fig. S18** (a) Stern–Volmer plot of  $I_0/I-1$  versus concentration of  $Fe^{3+}$  ion aqueous solutions for **3**. (b) Luminescent intensity versus concentration of  $Fe^{3+}$  ion aqueous solutions for **3**.

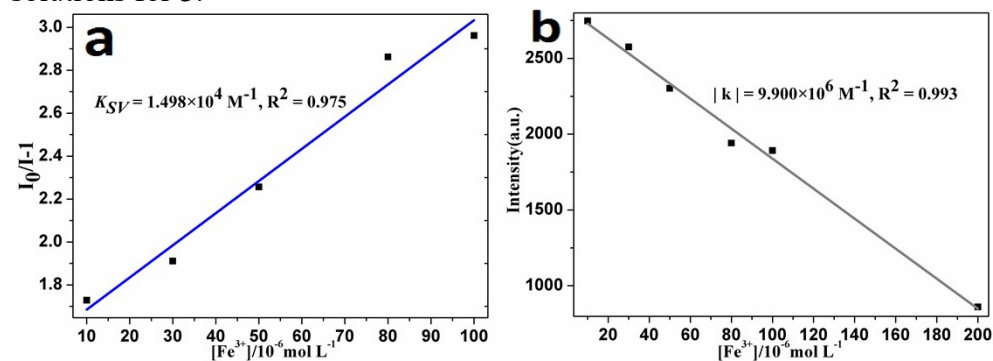

**Fig. S19** (a) Stern–Volmer plot of  $I_0/I-1$  versus concentration of  $Fe^{3+}$  ion aqueous solutions for **4**. (b) Luminescent intensity versus concentration of  $Fe^{3+}$  ion aqueous solutions for **4**.

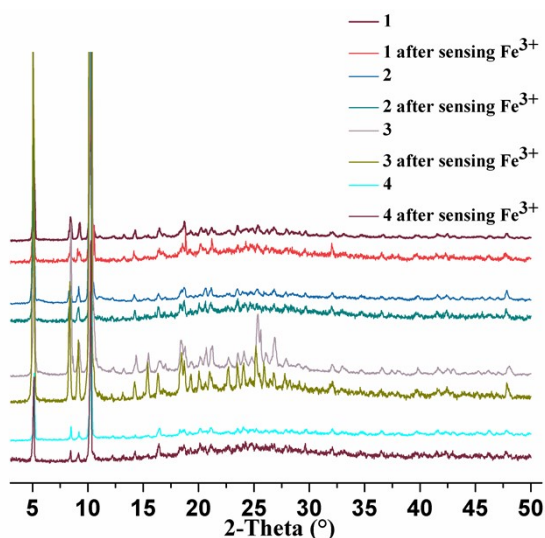

**Fig. S20** PXR D patterns of Ln-MOFs 1–4 treated by  $\text{Fe}(\text{NO}_3)_3$  aqueous solutions, indicating that 1–4 retain their frameworks after immersed in  $\text{Fe}(\text{NO}_3)_3$  aqueous solutions.

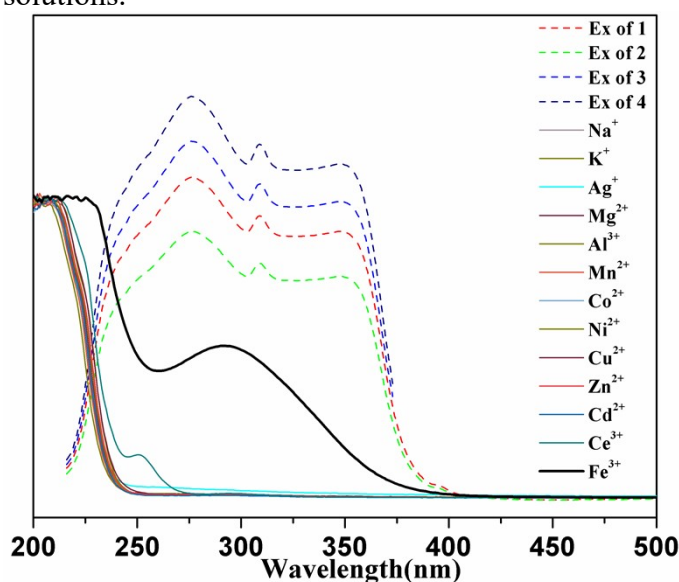

**Fig. S21** UV-vis adsorption spectra of different  $\text{M}(\text{NO}_3)_x$  aqueous solutions, and the excitation spectra of Ln-MOFs 1–4.

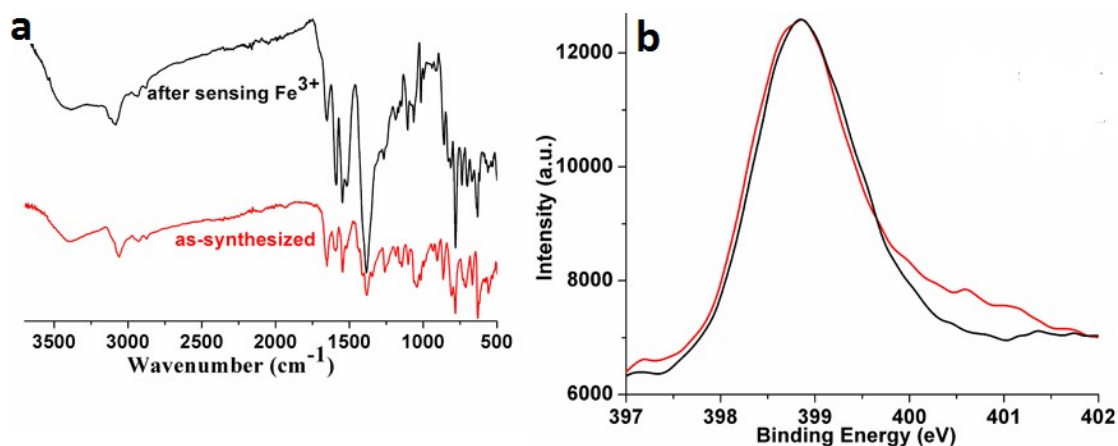

**Fig. S22** (a) IR absorption and (b)  $\text{N}1s$  spectrum of 1 before (red line) and after (black line) sensing  $\text{Fe}^{3+}$  ion.

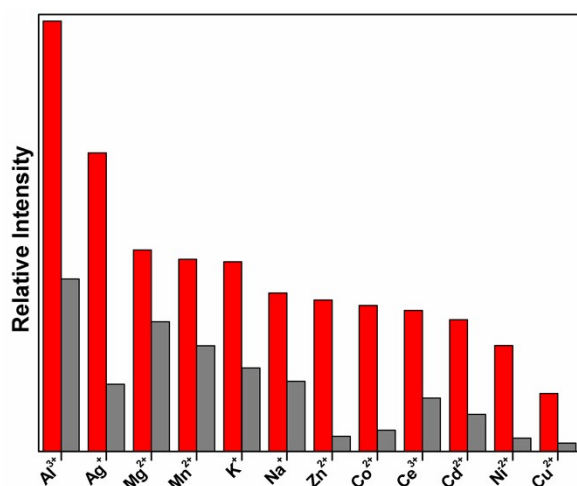

**Fig. S23** Luminescence intensities of **1** ( $\lambda_{\text{ex}} = 365 \text{ nm}$ ) in different metal ions ( $1 \times 10^{-2} \text{ mol L}^{-1}$ , red bar chart) and corresponding mixed-metal solutions containing  $\text{Fe}^{3+}$  ions ( $1 \times 10^{-3} \text{ mol L}^{-1}$ , gray bar chart). Note: Because **1** could possess inferior selectivity for sensing  $\text{Fe}^{3+}$  ions, it shows weak quenching effect compared those without other interference ions.

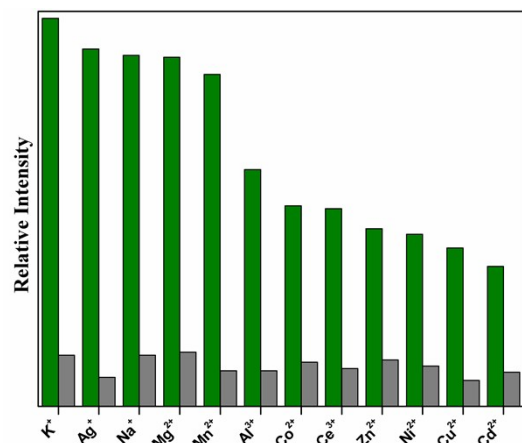

**Fig. S24** Luminescence intensities of **2** ( $\lambda_{\text{ex}} = 365 \text{ nm}$ ) in different metal ions ( $1 \times 10^{-2} \text{ mol L}^{-1}$ , green bar chart) and corresponding mixed-metal solutions containing  $\text{Fe}^{3+}$  ions ( $1 \times 10^{-3} \text{ mol L}^{-1}$ , gray bar chart).

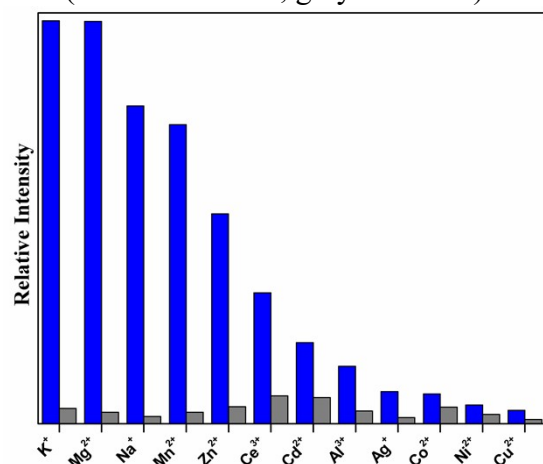

**Fig. S25** Luminescence intensities of **3** ( $\lambda_{\text{ex}} = 300 \text{ nm}$ ) in different metal ions ( $1 \times 10^{-2} \text{ mol L}^{-1}$ , blue bar chart) and corresponding mixed-metal solutions containing  $\text{Fe}^{3+}$  ions ( $1 \times 10^{-3} \text{ mol L}^{-1}$ , gray bar chart).

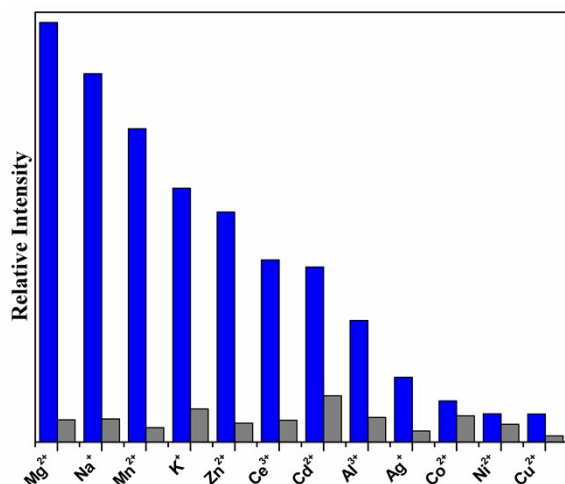

**Fig. S26** Luminescence intensities of **4** ( $\lambda_{\text{ex}} = 300 \text{ nm}$ ) in different metal ions ( $1 \times 10^{-2} \text{ mol L}^{-1}$ , blue bar chart) and corresponding mixed-metal solutions containing  $\text{Fe}^{3+}$  ions ( $1 \times 10^{-3} \text{ mol L}^{-1}$ , gray bar chart).

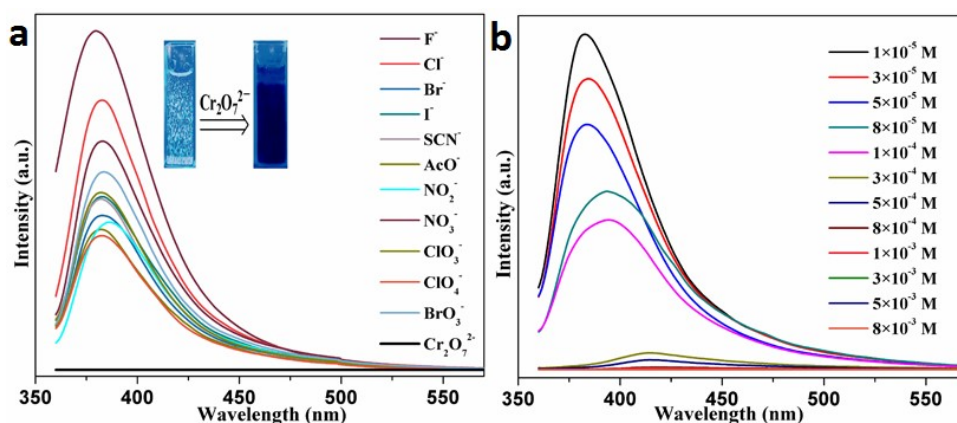

**Fig. S27** Luminescence spectra ( $\lambda_{\text{ex}} = 345 \text{ nm}$ ) of **3** dispersed in (a) different anionic aqueous solutions (The inset photographs taken under 254 nm UV irradiation, showing the quenching effects before (left) and after (right) dispersion in the  $\text{Cr}_2\text{O}_7^{2-}$  aqueous solution.), and (b) various concentrations of the  $\text{Cr}_2\text{O}_7^{2-}$  aqueous solutions.

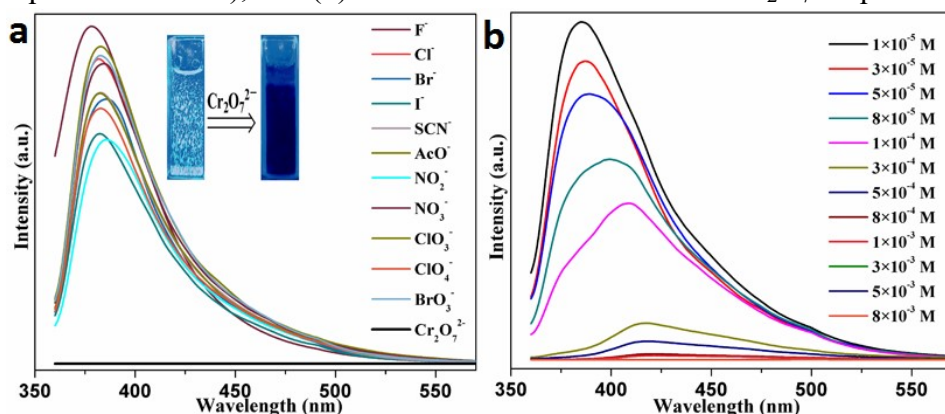

**Fig. S28** Luminescence spectra ( $\lambda_{\text{ex}} = 345 \text{ nm}$ ) of **4** dispersed in (a) different anionic aqueous solutions (The inset photographs taken under 254 nm UV irradiation, showing the quenching effects before (left) and after (right) dispersion in the  $\text{Cr}_2\text{O}_7^{2-}$  aqueous solution.), and (b) various concentrations of the  $\text{Cr}_2\text{O}_7^{2-}$  aqueous solutions.

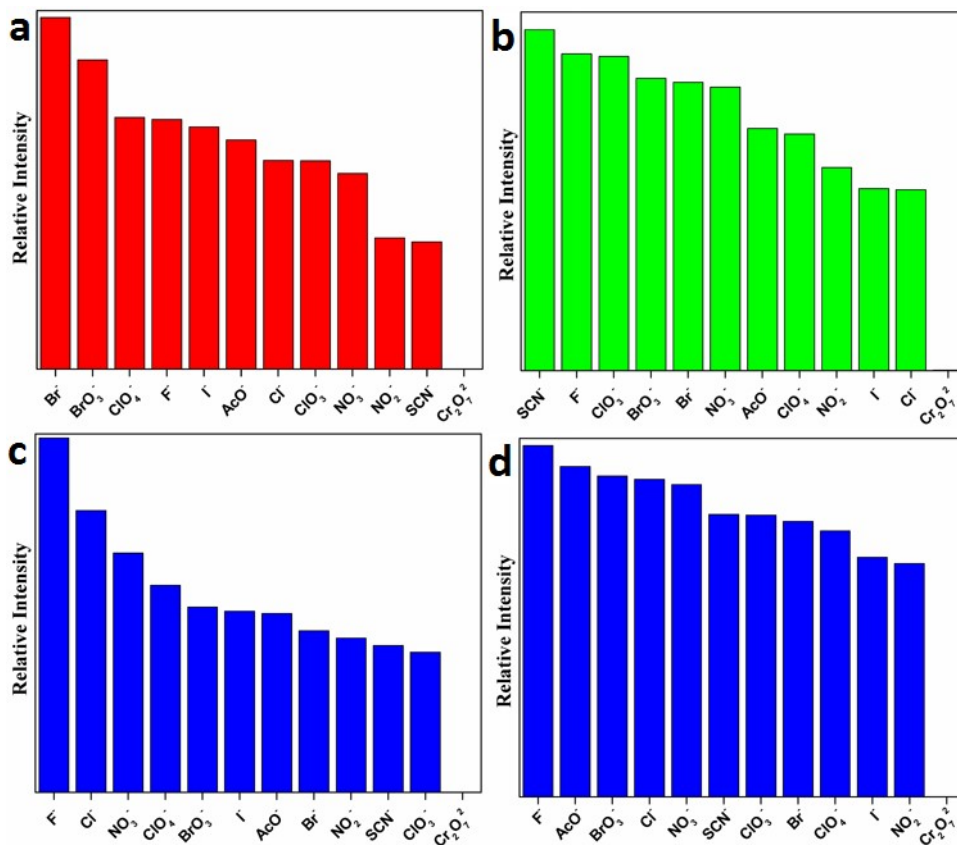

**Fig. S29** The bar chart of luminescent intensities of samples suspended in different anionic aqueous solutions with maximum emission wavelength at 613 nm of **1** (a), 542 nm of **2** (b), 386 nm of **3** (c) and 392 nm of **4** (d).

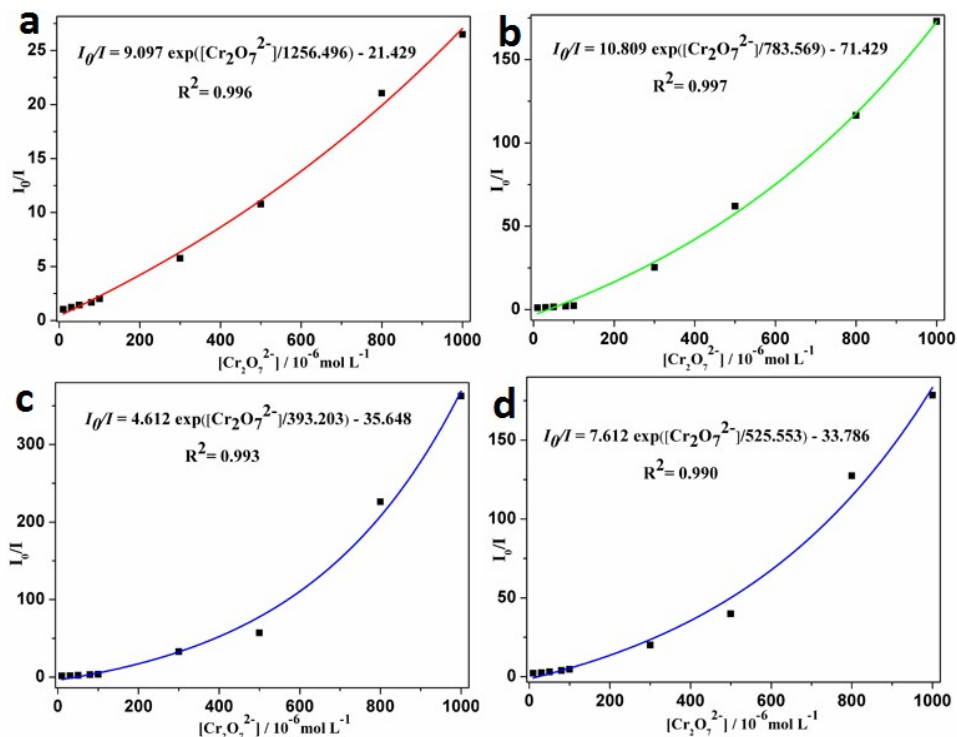

**Fig. S30** Plot of  $I_0/I$  versus concentration of  $\text{Cr}_2\text{O}_7^{2-}$  anion aqueous solutions for **1** (a), **2** (b), **3** (c) and **4** (d).



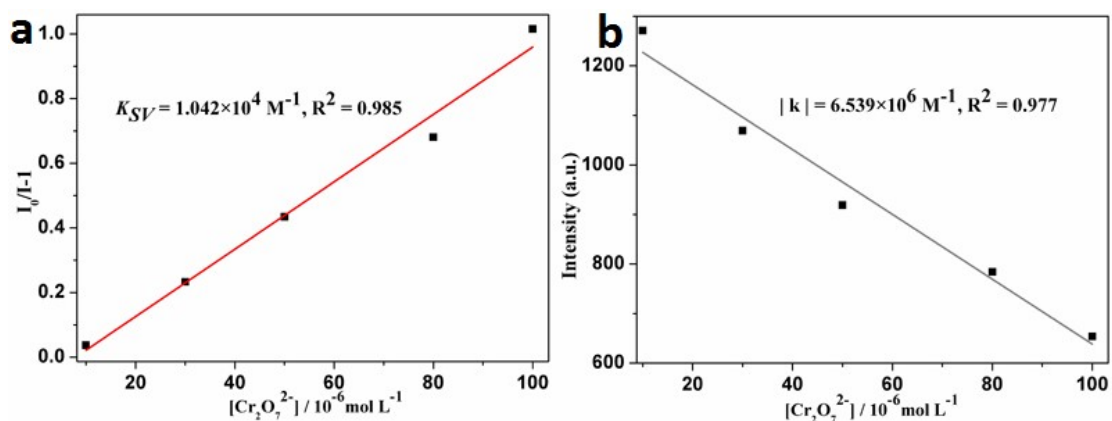

**Fig. S31** (a) Stern–Volmer plot of  $I_0/I-1$  versus concentration of  $Cr_2O_7^{2-}$  anion aqueous solutions for **1**. (b) Luminescent intensity versus concentration of  $Cr_2O_7^{2-}$  anion aqueous solutions for **1**.

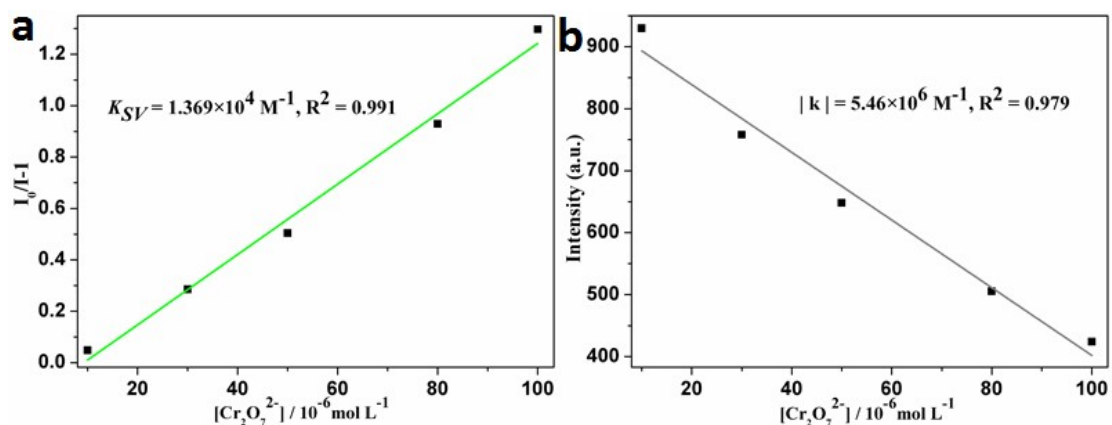

**Fig. S32** (a) Stern–Volmer plot of  $I_0/I-1$  versus concentration of  $Cr_2O_7^{2-}$  anion aqueous solutions for **2**. (b) Luminescent intensity versus concentration of  $Cr_2O_7^{2-}$  anion aqueous solutions for **2**.

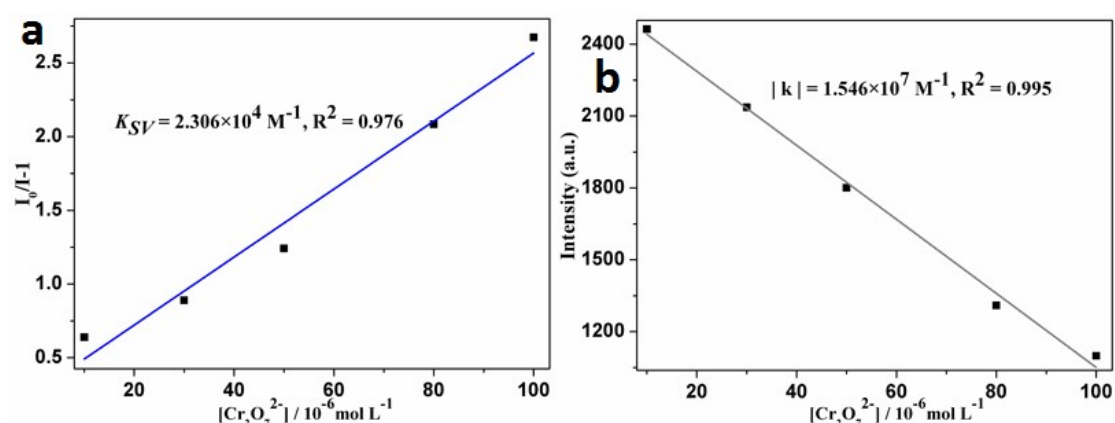

**Fig. S33** (a) Stern–Volmer plot of  $I_0/I-1$  versus concentration of  $Cr_2O_7^{2-}$  anion aqueous solutions for **3**. (b) Luminescent intensity versus concentration of  $Cr_2O_7^{2-}$  anion aqueous solutions for **3**.

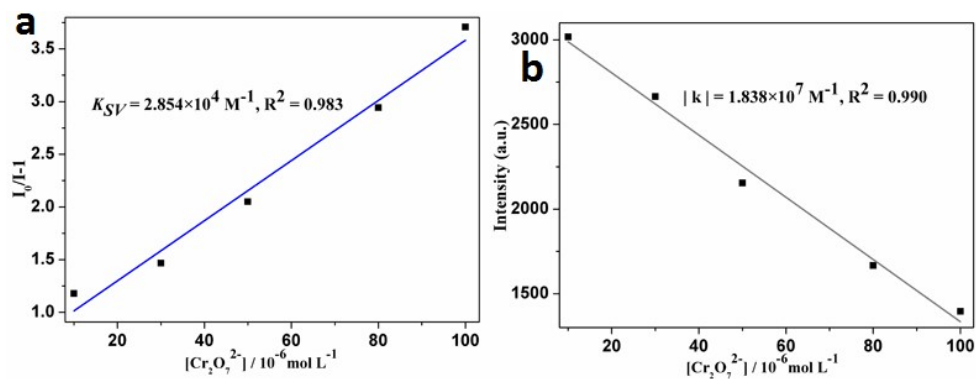

**Fig. S34** (a) Stern–Volmer plot of  $I_0/I-1$  versus concentration of  $\text{Cr}_2\text{O}_7^{2-}$  anion aqueous solutions for **4**. (b) Luminescent intensity versus concentration of  $\text{Cr}_2\text{O}_7^{2-}$  anion aqueous solutions for **4**.

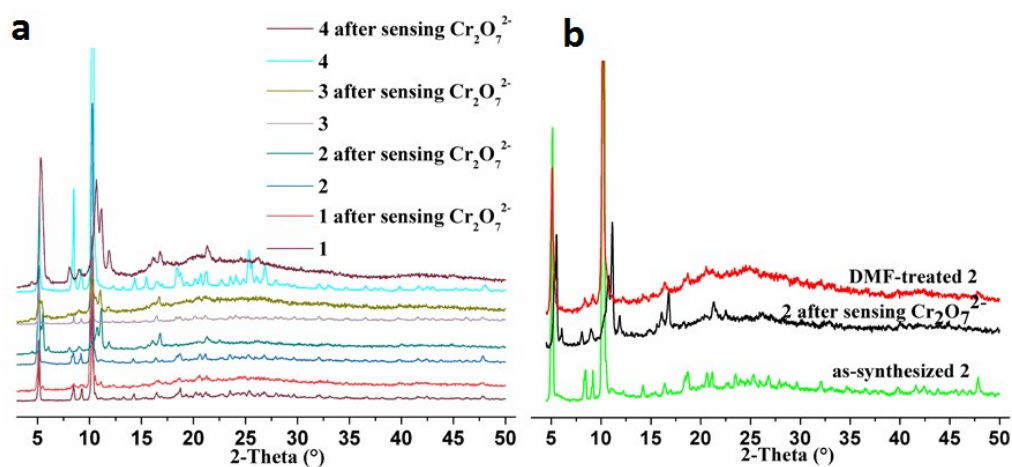

**Fig. S35** PXRD patterns of (a) Ln-MOFs **1–4** treated by  $\text{K}_2\text{Cr}_2\text{O}_7$  aqueous solutions, and (b) re-solvated **2** by DMF/ $\text{H}_2\text{O}$  solution.

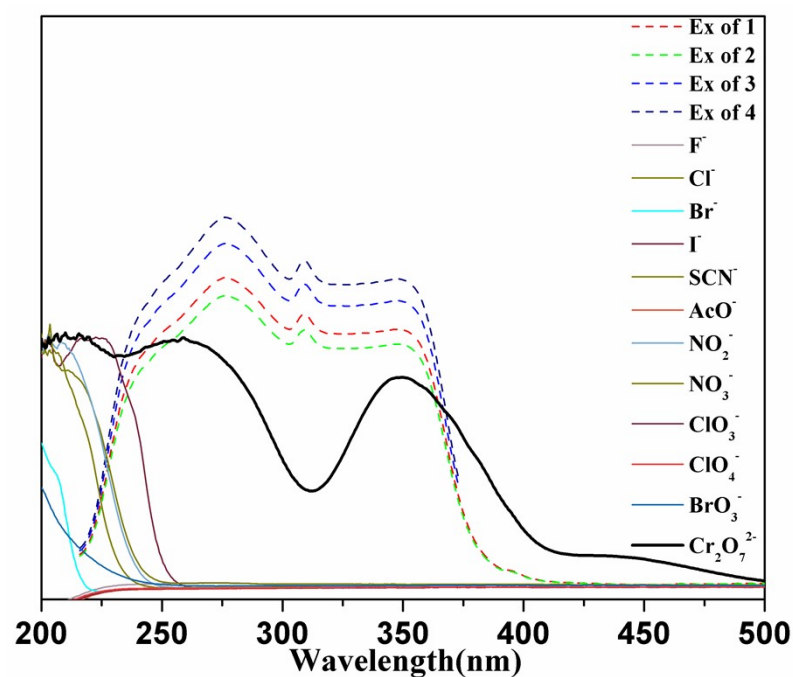

**Fig. S36** UV-vis adsorption spectra of different  $\text{K}_y\text{A}$  aqueous solutions, and the excitation spectra of Ln-MOFs **1–4**.



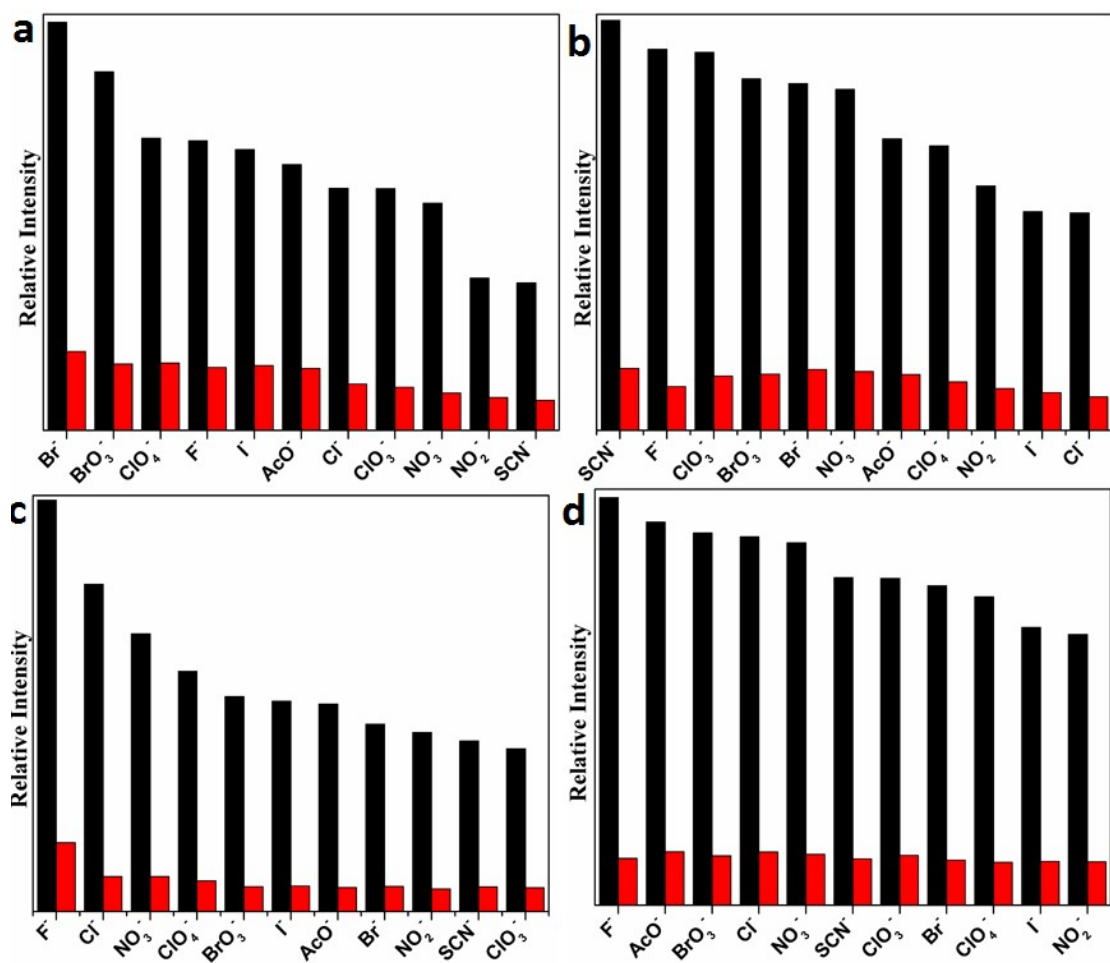

**Fig. S37** Luminescence intensities of **1** (a), **2** (b), **3** (c) and **4** (d) in different anion aqueous solutions ( $1 \times 10^{-2}$  mol L<sup>-1</sup>, black bar chart) and their corresponding mixed-anion solutions containing Cr<sub>2</sub>O<sub>7</sub><sup>2-</sup> anions ( $1 \times 10^{-3}$  mol L<sup>-1</sup>, red bar chart).
